# Supplementary material for: Hardness Enhancement in CoCrFeNi1−x(WC)x High-Entropy Alloy Thin Films Synthesised by Magnetron Co-Sputtering
Source: MDPI journal article supplement (doi:10.3390/coatings12020269), 2022-02-17
Supplement: s1 [file s1]

# Supplementary Materials: Hardness Enhancement in CoCrFeNi<sub>1-x</sub>(WC)<sub>x</sub> High-Entropy Alloy Thin Films Synthesised by Magnetron Co-Sputtering

Holger Schwarz <sup>1,\*</sup>, Thomas Uhlig <sup>2</sup>, Thomas Lindner <sup>2</sup>, Thomas Lampke <sup>2</sup>, Guntram Wagner <sup>2</sup> and Thomas Seyller <sup>1,3,\*</sup>

<sup>1</sup> Institute of Physics, Faculty of Natural Sciences, TU Chemnitz, 09107 Chemnitz, Germany;

<sup>2</sup> Institute of Materials Science and Engineering, Faculty of Mechanical Engineering, TU Chemnitz, 09107 Chemnitz, Germany; thomas.uhlig@mb.tu-chemnitz.de (T.U.); th.lindner@mb.tu-chemnitz.de (T.L.); thomas.lampke@mb.tu-chemnitz.de (T.L.); guntram.wagner@mb.tu-chemnitz.de (G.W.)

<sup>3</sup> Center for Materials, Architectures and Integration of Nanomembranes (MAIN), TU Chemnitz, 09107 Chemnitz, Germany

\* Correspondence: holger.schwarz@physik.tu-chemnitz.de (H.S.); thomas.seyller@physik.tu-chemnitz.de (T.S.)

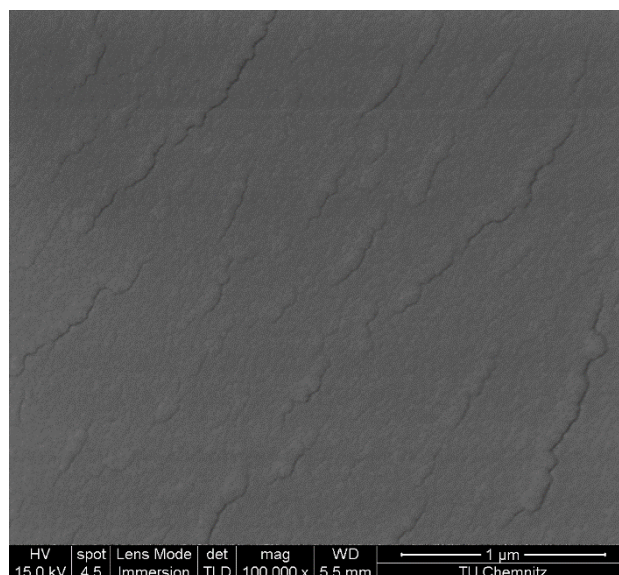

**Figure S1.** SEM image of sample PR8.
